# Supplementary material for: Comprehensive experimental study to compare the effects of flue gases and CO 2 injection on enhancing oil recovery and asphaltene deposition
Source: Research Square preprint supplement (doi:10.21203/rs.3.rs-6779359/v1), 2025-06-05
Supplement: Supplementary file 1 [file 669036be455b32905dee3801.docx]

**Appendix**

| **Research** | **Gas type** | **Oil sample** | **Core/ Model properties** | | **°API** | **Inj.**  **temp.** | **Inj. press.** | **Inj. rate** | **RF (%)** | **Asphaltene dep./ permeability reduction** |
| --- | --- | --- | --- | --- | --- | --- | --- | --- | --- | --- |
| *Fong et al. (1992) [62]* | CO2 | Recombined oil  (Stock tank +  synthetic gas) | Composite Core-long (synthetic) | L: 61.28 cm  D: 2.54 cm  Porosity:6%  :0.28 mD | 25 | 46.1 °C | 1520 psi (cte.) | 0.3 res. cc/hr  (avg.) horizontal | 64.5 | At pressure as high as 3050 psi no asphaltene deposition was observed |
| L: 63.4 cm  D: 2.54 cm  Porosity: 49%  :0.03 mD | 21 | 43.9 °C | 1875 psi (initial) | 0.3 res. cc/hr (cte.) vertical from top | 56 |
| Flue gas  (80% CO2+20% N2) | L: 63.4 cm  D: 2.54 cm  Porosity:49%  :0.03 mD | 21 | 43.9 °C | 2300 psi (initial) | 0.4 std. cc/min (cte.)  vertical from top | 23 |
| *Srivastava et al. (1999) [28]* | Flue Gas:  15.6 mol % CO2, 84.4 mol % N2 | Dead oil   Recombined live oil (dead oil + CH4 at 362.6 psi and 28°C) | Sandpack cores | Porosity: ~28–32 % Permeability: 0.5 to 2.4 mD | 14 | 28 °C | 363 to 392 psi | 1 cc/min horizontal | 42.1-51.1 | Not studied |
| Produced Gas:  14.9 mol % CO2, 85.1 mol % CH4 |
| CO2 |
| *Dong and Huang (2002) [33]* | -Flue Gas I:  84.4% N2, 15.6% CO2  -Flue Gas II:  80.8% N2, 5% O2, 14.2% CO2  -Flue Gas III:  75% N2, 25% CO2 | Dead oil | 2D physical model | Model size: 51.0 cm × 52.0 cm × 2.36 cm Porosity: ~36–41% Permeability: 0.9 to 9 Darcy | 14.1 | 28 °C | 362.5 psi | 1.71-25.58  cc/min horizontal | 13.4 | Not studied |
| *Shokoya et al. (2004) [35]* | Flue Gas A  (100% ) | Recombined oil  GOR:122 (std vol/vol)  asphaltene content: 0.16% | Slim Tube | | 39.7 | 116 °C | 4007-6680 psi | 1.2 PV | 45.30-67.00 | Not studied |
| Flue Gas B  (83%+16%+  1%CO) | 116 °C | 4043-6456 psi | 41.35-71.05 |
| Flue Gas C  (69%+30%+  1%CO) | 116 °C | 4028-6532 psi | 47.40-74.20 |
| *Shokoya et al. (2005) [63,64]* | Nitrogen  (100% ) | Recombined Oil A: GOR: 104.79 (m3/m3) | Long sandstone core | L: 2.4384 m  D: 5.08 cm  Porosity: 21.53%  :  327.2 mD (oil A) /  284.2 mD (oil B) | 39.7 | 116 °C | 27.47 MPa | 8.53 cc/hr | 35 | Not studied |
| 41.58 MPa | 50 |
| Flue Gas 1  (83%+16%  +1%CO) | Recombined Oil A: | 39.7 | 116 °C | 27.71MPa | 35 |
| Recomb. Oil B: GOR:52.657(m3/m3) | 37.3 | 80.6 °C | 17.68 MPa | 40 |
| Flue Gas 2  (69%+30%+ 1%CO) | Recombined Oil A | 39.7 | 116 °C | 27.82 MPa | 40 |
| Recombined Oil B | 37.3 | 80.6 °C | 17.64 | 48 |

**Appendix- Table A.1**: Overview of experimental study conducted on flue gas injection

| **Research** | **Gas type** | **Oil sample** | **Core/ Model properties** | | **°API** | **Inj.**  **temp.** | **Inj. press.** | **Inj. rate** | **RF (%)** | **Asphaltene dep./ permeability reduction** |
| --- | --- | --- | --- | --- | --- | --- | --- | --- | --- | --- |
| *Mohsenzadeh et al. (2014) [65]* | N2 | Dead oil | 3 Sets of 6 Core Series as Fractured Long Carbonate Core Annular space 0.65 cm around the core simulated the vertical fracture | L: 6*15 cm  D: 8.7 cm  Porosity: 16%  : 5.5 mD | 15.8 | 80 °C | 750 psi | 1st step:  5 cc/min (producing from fractures until gas breakthrough)  2nd step:  1 cc/min (producing from matrixes) | Before  GBT:  78.2 | Not studied |
| After GBT:  13.5 |
| CO2 | L: 6*15 cm  D: 8.7 cm  Porosity: 19%  : 8 mD | Before GBT:  68.3 |
| After GBT:  14.8 |
| Flue Gas (69%N2+30%CO2+1%CO) | L: 6*15 cm  D: 8.7 cm  Porosity: 17%  : 6.5 mD | Before GBT:  74.0 |
| After GBT:  9.8 |
| *Li et al. (2017) [67]* | Flue gas: 80 mol% N2, 20 mol% CO2  +  n-Hexane  +  Steam | Dead oil | Sandpacks | Length: 60 cm Diameter: 2.54 cm Porosity: 35.85% - 36.31% Permeability: 2069 - 2133 mD | - | 200 °C | 435 psi | Steam flow: 1.2 to 2.0 cc/min  Flue gas flow: 0.6 cc/min  n-Hexane flow: 0.2 cc/min | 80.01 | Studied via SARA analysis of produced and residual oils and molecular weight of asphaltenes Result: Residual oil showed increased heavy components and less stable asphaltenes, indicating potential for asphaltene precipitation and deposition |
| *Pang et al. (2018) [68]* | Flue gas: 80% N2, 20% CO2  +  Steam | Dead oil | 1D Sandpack | 60 cm length ×  3.8 cm diameter;  porosity: ~35–39%; permeability: ~2.2–2.6 µm² (2200–2600 mD) | - | 250 °C | 435 psi | - 1D tests: 5 cc/min - 3D tests: 25 cc/min (15 cc/min steam + 10 cc/min flue gas) | 49.5 | Not studied |
| 3D Model | Width: 40 cm, thickness: 30 cm;  net pay simulated as  16 cm;  porosity: 35%; permeability:  60,000 mD |
| *Wu et al. (2018) [69]* | Flue gas:  (80% N2, 20% CO2) +  Steam | Dead oil | 3D physical model | dimensions:  40 cm ×40 cm ×16 cm;  Quartz sand is used as the porous medium | - | 250 °C | 435 psi | 25 cc/min (steam + flue gas) | 49.49 | Asphaltene content measured, decreased in produced oil, increased in residual oil |
| *Tao et al. (2021) [70]* | Flue gas:  (80% N2, 20%CO2)  +  Steam | Dead oil | 3D cylindrical physical model | Size: 150 cm × 100 cm, Volume: 196.35 L  Porosity: 34.4%  Permeability: 2.7 Darcy | - | 350 °C | - | 16 cc/min steam +  4 cc/min flue gas | 5.7 (improvement) | Asphaltene content decreased in produced oil during all stages |

**Appendix- Table A.1**: Overview of experimental study conducted on flue gas injection (continued)

| **Research** | **Gas type** | **Oil sample** | **Core/ Model properties** | | **°API** | **Inj.**  **temp.** | **Inj. press.** | | **Inj. rate** | **RF (%)** | **Asphaltene dep./ permeability reduction** |
| --- | --- | --- | --- | --- | --- | --- | --- | --- | --- | --- | --- |
| *Min and Zhang (2024) [71]* | Flue gas:  (80% N2, 20% CO2)  +  Steam | Dead oil | 2D physical model | 40 cm × 50 cm × 1 cm | - | 350 °C | 435 psi | | Steam:  10 cc/min  Flue gas: 10 cc/min | 68.8 | Not studied |
| *Jalili et al. (2024) [4]* | Flue Gas (A power plant’s exhaust): 82.47%N2+10.38% CO2+ 0.13%CO+ 6.14% + reminder (SO2+ NO+ NO2) | Bottom hole live Oil: GOR 1113 (SCF/STB) | 1 long core  (4 carbonate core series) | L:20.329 Cm  D: 3.783 cm  Porosity: 17% (avg.)  K: 1.64 mD | 32.4 | 112 °C | 5000 psi | | 0.05 cc/min  (cte.) | 36 | %Asph. Dep: - |
| %Perm. Red: 4.425% |
| CO2 | 86 | %Asph. Dep: - |
| %Perm. Red: 14.832% |
| *This study* | Flue Gas:  (75%N2+25%CO2) | Recombined Oil:  GOR: 342.39 (SCF/STB) | 2 carbonate cores | F#1 | 21.4 | 65 °C | Immiscible | 4000 psi | Variable flow rate  (Constant pressure) | 85.6 | %Asph. Dep:48.61 |
| Flue Gas: (75%N2+25%CO2) | F#1:  L:5.121Cm  D: 3.80 cm  Porosity: 29.5%  K: 1.5 mD | 110 °C | 3000 psi | 50.1 | %Asph. Dep: 35.21 |
| %Perm. Red: 3.10 |
| 4000 psi | 62.1 | %Asph. Dep: 41.12 |
| %Perm. Red: 8.27 |
| 6000 psi | 81.8 | %Asph. Dep: 50.41 |
| %Perm. Red: 15.04 |
| CO2 | F#1 | 110 °C | Miscible | 6000 psi (>MMP) | 90.0 | %Asph. Dep: 59.82 |
| %Perm. Red: 25.10 |
| CO2 | C#2:  L: 4.885 Cm  D: 3.84 cm  Porosity:28.3%  K: 3.6 mD | Immiscible | 3000 psi (<MMP) | 58.2 | %Asph. Dep: 20.16 |
| %Perm. Red: 27.78 |
| Immiscible | 4300 psi (<MMP) | 76.1 | %Asph. Dep: 52.41 |
| %Perm. Red: 27.22 |
| Miscible | 5000 psi (>MMP) | 81.8 | %Asph. Dep: 25.55 |
| %Perm. Red:23.16 |

**Appendix- Table A.1**: Overview of experimental study conducted on flue gas injection (continued)
